# Supplementary material for: Exploring the Possible Mechanism and Drug Targets of Huang-Qi-Gui-Zhi-Wu-Wu Decoction for the Treatment of Chemotherapy-Induced Peripheral Neuropathy on Network Pharmacology
Source: Evid Based Complement Alternat Med. 2020 Nov 22;2020:2363262. doi: 10.1155/2020/2363262 (PMC7704154; doi:10.1155/2020/2363262)
Supplement: Supplementary Materials — Supplementary 1. Table S1: compounds identified in the HQGZWWD formula. Supplementary 2. Table S2: effective compounds identified in the HQGZWWD formula. Supplementary 3. Table S3: targets of the HQGZWWD formula. Supplementary 4. Table S4: targets of CIPN. [file 2363262.f1.zip]

Archive with 4 entries (4 files):
- 2363262.f1/Supplementary Materials S1.txt
- 2363262.f1/Supplementary Materials S2.txt
- 2363262.f1/Supplementary Materials S3.txt
- 2363262.f1/Supplementary Materials S4.txt
