# Supplementary material for: Exploring the Possible Mechanism and Drug Targets of Huang-Qi-Gui-Zhi-Wu-Wu Decoction for the Treatment of Chemotherapy-Induced Peripheral Neuropathy on Network Pharmacology
Source: Evid Based Complement Alternat Med. 2020 Nov 22;2020:2363262. doi: 10.1155/2020/2363262 (PMC7704154; doi:10.1155/2020/2363262)
Supplement: Supplementary Materials — Supplementary 1. Table S1: compounds identified in the HQGZWWD formula. Supplementary 2. Table S2: effective compounds identified in the HQGZWWD formula. Supplementary 3. Table S3: targets of the HQGZWWD formula. Supplementary 4. Table S4: targets of CIPN. [file 2363262.f1.zip › 2363262.f1/Supplementary Materials S1.txt]

Compounds identified in the HQGZWWD formula
Herbs	Mol ID	Compounds
Huangqi Hedysarum Multijugum Maxim (Huang Qi)	MOL000114	vanillic acid
	MOL000131	EIC
	MOL000211	Mairin
	MOL001955	Heriguard
	MOL000239	Jaranol
	MOL000251	Rhamnocitrin
	MOL000295	alexandrin
	MOL000296	hederagenin
	MOL000033	(3S,8S,9S,10R,13R,14S,17R)-10,13-dimethyl-17-[(2R,5S)-5-propan-2-yloctan-2-yl]-2,3,4,7,8,9,11,12,14,15,16,17-dodecahydro-1H-cyclopenta[a]phenanthren-3-ol
	MOL000354	isorhamnetin
	MOL000356	lupeol
	MOL000371	3,9-di-O-methylnissolin
	MOL000372	3-Hydroxy-2-picoline
	MOL000373	(2S)-4-methoxy-7-methyl-2-[1-methyl-1-[(2S,3R,4S,5S,6R)-3,4,5-trihydroxy-6-methylol-tetrahydropyran-2-yl]oxy-ethyl]-2,3-dihydrofuro[3,2-g]chromen-5-one
	MOL000374	5'-hydroxyiso-muronulatol-2',5'-di-O-glucoside
	MOL000375	5'-hydroxyiso-muronulatol-2',5'-di-O-glucoside_qt
	MOL000376	7,2'-dihydroxy-3',4'-dimethoxyisoflavone-7-O-¦Â-D-glucoside
	MOL000377	7-hydroxy-3-(2-hydroxy-3,4-dimethoxy-phenyl)chromone
	MOL000378	7-O-methylisomucronulatol
	MOL000379	9,10-dimethoxypterocarpan-3-O-¦Â-D-glucoside
	MOL000380	(6aR,11aR)-9,10-dimethoxy-6a,11a-dihydro-6H-benzofurano[3,2-c]chromen-3-ol
	MOL000381	13-hydroxy-9,11-octadecadienoic acid
	MOL000382	Arabinose,d
	MOL000383	D-Galacturonic acid, homopolymer
	MOL000384	DL-Glucuronic acid
	MOL005928	isoferulic acid
	MOL000386	Fucopyranose, L-
	MOL000387	Bifendate
	MOL000388	gamma-aminobutyric acid
	MOL000389	FERULIC ACID (CIS)
	MOL000390	daidzein
	MOL000391	Ononin
	MOL000392	formononetin
	MOL000393	Soyasaponin I
	MOL000394	choline
	MOL000395	GGB
	MOL000396	(+)-Syringaresinol
	MOL000397	cis-p-Coumarate
	MOL000398	isoflavanone
	MOL000399	Docosanoate
	MOL000400	Flavaxin
	MOL000401	astragalosideI
	MOL000402	astragalosideI_qt
	MOL000403	astragalosideII
	MOL000404	astragalosideII_qt
	MOL000405	astragaloside¢ó
	MOL000406	astragaloside¢ó_qt
	MOL000407	astragaloside¢ô
	MOL000408	astragaloside¢ô_qt
	MOL000409	AstragalosideIV
	MOL000410	AstragalosideIV_qt
	MOL000411	Astraisoflavanin
	MOL000412	Mucronulatol
	MOL000413	astrachrysoside A
	MOL000414	Caffeate
	MOL000415	rutin
	MOL000416	Lariciresinol
	MOL000417	Calycosin
	MOL000418	3'-Hydroxy-4'-methoxyisoflavone-7-O-beta-D-glucoside
	MOL000419	astrasieversianin XV
	MOL000420	XLS
	MOL000421	nicotinic acid
	MOL000422	kaempferol
	MOL000423	rhamnocitrin-3-O-glucoside
	MOL000424	RAM
	MOL000425	asernestioside A
	MOL000426	asernestioside A_qt
	MOL000427	asernestioside B
	MOL000428	asernestioside B_qt
	MOL000429	Crystal VI
	MOL000430	betaine
	MOL000431	coumarin
	MOL000432	linolenic acid
	MOL000433	FA
	MOL000434	acetylastragaloside I
	MOL000435	acetylastragaloside I_qt
	MOL000436	(Z)-1-(2,4-dihydroxyphenyl)-3-(4-hydroxyphenyl)prop-2-en-1-one
	MOL000437	Hirsutrin
	MOL000438	(3R)-3-(2-hydroxy-3,4-dimethoxyphenyl)chroman-7-ol
	MOL000439	isomucronulatol-7,2'-di-O-glucosiole
	MOL000440	isomucronulatol-7,2'-di-O-glucosiole_qt
	MOL000441	LUPENONE
	MOL000442	1,7-Dihydroxy-3,9-dimethoxy pterocarpene
	MOL000054	L-
	MOL000061	Prolinum
	MOL000069	palmitic acid
	MOL000098	quercetin
Cinnamomi Ramulus (Gui Zhi)	MOL000103	PHB
	MOL000105	protocatechuic acid
	MOL010544	1, 10, 14-trimethyl-2-pentadecanone
	MOL010545	2-Methoxycinnamic Acid
	MOL010546	ST069309
	MOL010547	2-Phenylpropenal
	MOL010548	beta-Methoxystyrene
	MOL010549	m-Formylphenol
	MOL010550	4-Methyl-2-(1,5-dimethyl-4-hexenyl)-3-cyclohexen-1-ol
	MOL010551	DMEP
	MOL010552	2-Methyl-N-phenylmaleimide
	MOL010553	¦Â-Bisabolene
	MOL010554	694-87-1
	MOL010555	1,2-Dibenzoylethane
	MOL010556	WLN: RVO2R
	MOL010557	WLN: 2OVR
	MOL010558	Substance H 36
	MOL010559	2-Coumarinate
	MOL010560	WLN: VHO2R
	MOL010561	2-Methoxyphenylacetone
	MOL010562	Hydro Cinnamicacid
	MOL010563	Methyl (Z)-cinnamate
	MOL010564	NK
	MOL010957	(Z)-Ethyl cinnamate
	MOL001121	19894-97-4
	MOL001123	muurolene
	MOL000117	Cymol
	MOL000118	(L)-alpha-Terpineol
	MOL001201	(1R,5R,7S)-4,7-dimethyl-7-(4-methylpent-3-enyl)bicyclo[3.1.1]hept-3-ene
	MOL001217	()-Bornyl acetate
	MOL000125	(-)-alpha-Pinene
	MOL000126	(-)-nopinene
	MOL000130	CAM
	MOL001300	PEL
	MOL001301	cis-Zimtsaeure
	MOL001394	Oktadekan
	MOL001452	protocatechualdehyde
	MOL001556	Isocaryophyllene
	MOL001578	Hypnon
	MOL001599	¦Á-cubebol
	MOL000166	ZINC01609418
	MOL001736	(-)-taxifolin
	MOL001746	ELD
	MOL001747	Tetracosane
	MOL001862	Cadalin
	MOL000019	D-Camphene
	MOL000197	Myrcene
	MOL002024	(1S,4R)-1,7,7-trimethylbicyclo[2.2.1]hept-2-ene
	MOL002085	alpha-Cubebene
	MOL002153	1H-Cycloprop(e)azulen-7-ol, decahydro-1,1,7-trimethyl-4-methylene-, (1aR-(1aalpha,4aalpha,7beta,7abeta,7balpha))-
	MOL002163	WLN: 2VR
	MOL000219	BOX
	MOL002193	Cerulignol
	MOL002213	(Z)-1,3-di(phenyl)prop-2-en-1-one
	MOL002225	Styrone
	MOL002229	HEPTACOSANE
	MOL002295	cinnamic acid
	MOL000234	L-Limonen
	MOL002361	Terragon
	MOL000244	()-Borneol
	MOL000247	(Z,Z)-farnesol
	MOL002496	Sulcatone
	MOL000250	cis-Cinnamaldehyde
	MOL002502	copaene
	MOL000252	farnesol
	MOL000254	eugenol
	MOL002541	WLN: VH2R
	MOL000027	alpha-Curcumene
	MOL002836	anisaldehyde
	MOL002888	o-Anisaldehyde
	MOL003032	BZM
	MOL003047	[(1S)-endo]-(-)-Borneol
	MOL000340	HCI
	MOL003525	Pyruvophenone
	MOL003526	Cinnamyl acetate
	MOL003530	O-METHOXYCINNAMALDEHYDE
	MOL003537	T-Muurolol
	MOL003541	()-alpha-Longipinene
	MOL000357	Sitogluside
	MOL000358	beta-sitosterol
	MOL000359	sitosterol
	MOL000431	coumarin
	MOL000475	anethole
	MOL000492	(+)-catechin
	MOL005121	Octadecanal
	MOL002003	(-)-Caryophyllene oxide
	MOL005501	Green Oil
	MOL000608	()-Terpinen-4-ol
	MOL000612	(-)-alpha-cedrene
	MOL000666	hexanal
	MOL000671	()-Menthol
	MOL000676	DBP
	MOL000677	(1R,4R)-4-isopropyl-1,6-dimethyltetralin
	MOL000069	palmitic acid
	MOL000704	styrene
	MOL000708	WLN: VHR
	MOL000714	Hyacinthin
	MOL000073	ent-Epicatechin
	MOL000771	p-coumaric acid
	MOL000860	stearic acid
	MOL008656	(1R,3R,4S)-3,4-dimethylcyclohexan-1-ol
	MOL008668	2-ethoxypropanol
	MOL009625	2,6,10,15-tetramethylheptadecane
	MOL000968	beta-Bisabolene
	MOL000980	(4S)-4-[(1Z)-1,5-dimethylhexa-1,4-dienyl]-1-methylcyclohexene
	MOL000991	cinnamaldehyde
	MOL000018	(+/-)-Isoborneol
	MOL000023	Hemo-sol
	MOL000025	¦Á-Longipinene
	MOL000035	beta-Selinene
	MOL000037	¦Ã-elemene
	MOL000057	DIBP
	MOL000122	1,8-cineole
	MOL000123	geraniol
	MOL000128	NERYLACETATE
	MOL000131	EIC
	MOL000171	Guaiol
	MOL000196	L-Bornyl acetate
	MOL000198	(R)-linalool
	MOL000199	Safrol
	MOL000202	Moslene
	MOL000207	Methyleugenol
	MOL000208	()-Aromadendrene
	MOL000249	Methylcinnamate
	MOL000257	(-)-beta-Phellandrene
	MOL000259	o-Thymol
	MOL000266	beta-Cubebene
	MOL000270	CHEBI:7
	MOL000303	caprylic acid
	MOL000474	(-)-Epoxycaryophyllene
	MOL000479	Farnesene
	MOL000597	Neryl acetate
	MOL000615	delta-amorphene
	MOL000675	oleic acid
	MOL000698	(R)-(-)-alpha-Phellandrene
	MOL000699	m-Cymol
	MOL000864	MYS
	MOL000865	hexadecane
	MOL000875	Cedrol
	MOL000905	()-beta-Pinene
	MOL000908	beta-elemene
	MOL000911	Terpilene
	MOL000914	(5S)-1-isopropyl-4-methylbicyclo[3.1.0]hex-3-ene
	MOL000922	(R)-p-Menth-1-en-4-ol
	MOL000933	.gamma.-Bisabolene
	MOL000935	Hepanal
	MOL000937	58870_FLUKA
	MOL000942	(1R,4S,4aR,8aR)-4-isopropyl-1,6-dimethyl-3,4,4a,7,8,8a-hexahydro-2H-naphthalen-1-ol
	MOL000943	epi-10- .gamma.-Eudesmol
	MOL000974	cuminal
	MOL001179	(&#8722;)-Alloaromadendrene
	MOL001237	o-Acetyltoluene
	MOL001442	phytol
	MOL001600	copaene
	MOL001602	1,4-cadinadiene
	MOL001640	NON
	MOL002040	(1S,4R)-fenchone
	MOL002042	thymol
	MOL002046	hexanoic acid
	MOL002062	Ethyl methoxycinnamate
	MOL002095	DEP
	MOL002124	beta-asarone
	MOL002334	Homocresol
	MOL002453	(-)-Comphene
	MOL002504	Peruviol
	MOL002691	Iva
	MOL002744	(R)-2-methylbutyric acid
	MOL002834	Ethylcinnamate
	MOL002839	chavicol
	MOL002972	(4S)-1-methyl-4-(6-methylhepta-1,5-dien-2-yl)cyclohexene
	MOL002983	Guasol
	MOL002998	IPH
	MOL003050	nonanoic acid
	MOL003126	alpha cadinene
	MOL003177	Syringaldehyde
	MOL003393	(1S,4S)-7-isopropylidene-1,4-dimethyl-2,3,4,5,6,8-hexahydro-1H-azulene
	MOL003493	naphthalene
	MOL003504	Tolualdehydes
	MOL003521	Isohomogenol
	MOL003524	Benzenepropanol
	MOL003534	CADINENE
	MOL003536	T-Cadinol
	MOL003573	calacorene
	MOL003785	Benzyl acetate
	MOL003937	Naphthalene, 1,2,3,4,4a,5,6,8a-octahydro-7-methyl-4-methylene-1-(1-methylethyl)-, (1alpha,4abeta,8aalpha)-
	MOL004056	¦Á-Cadinene
	MOL004102	2-Coumarate
	MOL004479	o-cresol
	MOL004480	acetic acid
	MOL004576	taxifolin
	MOL004664	heptanoic acid
	MOL004707	tau-cadinol
	MOL004717	(3R,4aR,8aR)-3-isopropenyl-5,8a-dimethyl-2,3,4,4a,7,8-hexahydro-1H-naphthalene
	MOL004727	(1R,4aR,8aS)-1-isopropyl-7-methyl-4-methylene-2,3,4a,5,6,8a-hexahydro-1H-naphthalene
	MOL004784	Stenol
	MOL005472	1,2-Benzenedicarboxylicacid, mono(2-ethyl) hexylester
	MOL005610	WLN: QR BV1
	MOL005976	Tetradecanal
	MOL005979	Papite
	MOL006219	Clorius
	MOL006287	¦Á-muurolene
	MOL006316	(1R,8aS)-4-isopropyl-1,6-dimethyl-1,2,3,7,8,8a-hexahydronaphthalene
	MOL007946	19435-97-3
	MOL010120	(1S,4R,4aR,8aR)-1-isopropyl-4,7-dimethyl-2,3,4,5,6,8a-hexahydro-1H-naphthalen-4a-ol
	MOL010257	Isoamyl benzoate
	MOL010259	Apple oil
	MOL010380	()-alpha-Funebrene
	MOL010947	(Z)-calamenene
	MOL011148	bergamotene (Z,.alpha.,cis)
	MOL011169	Peroxyergosterol
	MOL011428	Phenethyl acetate
	MOL011432	(1R,3R,5R)-6,6-dimethyl-2-methylene-3-norpinanol
	MOL011848	d-Piperitone
	MOL011899	eremophilene
	MOL012174	o-Anisic acid
	MOL012344	(4aR,9aS)-2,9,9-trimethyl-5-methylene-4,4a,6,7,8,9a-hexahydro-3H-benzo[7]annulene
	MOL012439	(1Z,4E,8E)-2,6,6,9-tetramethylcycloundeca-1,4,8-triene
	MOL012644	caryophellene
	MOL013023	Biosol
	MOL013205	p-Methoxycinnamaldehyde
Paeoniae Radix Alba (Bai Shao)	MOL000106	PYG
	MOL001218	Pisol
	MOL001246	(1R)-()-Nopinone
	MOL001393	myristic acid
	MOL001396	PENTADECYLIC ACID
	MOL001402	Octacosane
	MOL001644	Dodecanal
	MOL001801	salicylic acid
	MOL001888	2,2-dimethylcyclohexanol
	MOL001889	Methyl linolelaidate
	MOL001890	octadec-9-ene
	MOL001891	9-methylenefluorene
	MOL001892	Dipropyl phthalate
	MOL001893	BU3
	MOL001894	Bicetyl
	MOL001895	Dibutylphenol
	MOL001896	bicyclo[3.1.1]hept-2-ene-2-methanol, 6,6-dimethyl-
	MOL001897	()-trans-Myrtanol
	MOL001898	Acetyl oxide
	MOL001899	ZINC02169908
	MOL001900	Pulchinenoside A_qt
	MOL001901	24-Methylenecycloartanol
	MOL001902	3¦Â,23-dihydroxy-oleana-11,13(18)-dien-28-oic acid
	MOL001903	3¦Â-hydroxy-11-oxo-olean-12-en-28-oic acid
	MOL001904	2 - methyl - 3 - (2 - propenyl) - phenol
	MOL001905	3¦Â-hydroxy-oleana-11,13(18)-dien-28-oic acid?
	MOL001906	Methylgallate
	MOL001907	Progallin A
	MOL001908	(Z)-(1S,5R)-beta-pinen-10-yl-beta-vicianoside
	MOL001909	(Z)-(1S,5R)-beta-pinen-10-yl-beta-vicianoside_qt
	MOL001910	11alpha,12alpha-epoxy-3beta-23-dihydroxy-30-norolean-20-en-28,12beta-olide
	MOL001911	albiflorin R1
	MOL001912	albiflorin R1_qt
	MOL001913	propyl (2R)-2-hydroxypropanoate
	MOL001914	gallotannin
	MOL001915	paeonoside
	MOL000561	Astragalin
	MOL001917	(3S,3aR,5S,6S,7aR)-5,6-dihydroxy-3,6-dimethyl-3,3a,4,5,7,7a-hexahydrobenzofuran-2-one
	MOL001918	paeoniflorgenone
	MOL001919	(3S,5R,8R,9R,10S,14S)-3,17-dihydroxy-4,4,8,10,14-pentamethyl-2,3,5,6,7,9-hexahydro-1H-cyclopenta[a]phenanthrene-15,16-dione
	MOL009092	Pentagalloylglucose
	MOL001921	Lactiflorin
	MOL001922	2-Hexyl-1-decanol
	MOL001923	[(3S,3aR,6S,7aR)-6-hydroxy-6-methyl-2,5-dioxo-3a,4,7,7a-tetrahydro-3H-benzofuran-3-yl]methyl benzoate
	MOL001924	paeoniflorin
	MOL001925	paeoniflorin_qt
	MOL001926	1,2,3,6-tetra-O-galloylglucose
	MOL001927	albiflorin
	MOL001928	albiflorin_qt
	MOL001929	alexandrin
	MOL001930	benzoyl paeoniflorin
	MOL001931	4-Chlorobutyric acid
	MOL001932	galloylpaeoniflorin
	MOL001933	oxypaeoniflorin
	MOL001934	(3R,3aR,6S,7aR)-6-hydroxy-3,6-dimethyl-3a,4,7,7a-tetrahydro-3H-benzofuran-2,5-dione
	MOL001935	(3aR,6S,7aR)-6-hydroxy-6-methyl-3-methylene-3a,4,7,7a-tetrahydrobenzofuran-2,5-dione
	MOL001936	cis-5-Octen-1-ol
	MOL001937	24253-30-3
	MOL000211	Mairin
	MOL000219	BOX
	MOL000263	oleanolic acid
	MOL000358	beta-sitosterol
	MOL000359	sitosterol
	MOL000422	kaempferol
	MOL000492	(+)-catechin
	MOL000513	3,4,5-trihydroxybenzoic acid
	MOL000551	Hederagenol
	MOL000610	TRD
	MOL000612	(-)-alpha-cedrene
	MOL000676	DBP
	MOL000775	EEE
	MOL000860	stearic acid
	MOL000867	Heptadekan
	MOL000868	LFA
	MOL000869	Henicosane
	MOL000874	paeonol
	MOL000875	Cedrol
	MOL000357	Sitogluside
	MOL000842	sucrose
	MOL000876	(6R,10R)-6,10,14-trimethylpentadecan-2-one
	MOL001219	Satol
	MOL004480	acetic acid
	MOL005089	Oxypaeoniflorin
	MOL007465	10-Methylnonadecane
	MOL008707	Ethylisobutyrate
Zingiber Officinale Roscoe (Sheng Jiang)	MOL000117	Cymol
	MOL000118	(L)-alpha-Terpineol
	MOL000119	ZINC02040970
	MOL001217	()-Bornyl acetate
	MOL000122	1,8-cineole
	MOL000123	geraniol
	MOL000124	citral
	MOL001254	(S)-p-Mentha-1,8-dien-7-al
	MOL000127	Neral
	MOL001566	calarene
	MOL000166	ZINC01609418
	MOL000197	Myrcene
	MOL000200	(S)-(+)-alpha-Phellandrene
	MOL000201	p-Ocimene
	MOL000202	Moslene
	MOL002042	thymol
	MOL000206	isoeugenol
	MOL002117	¦Â-sesquiphellandrene
	MOL000234	L-Limonen
	MOL002465	9-Octadecenoic acid (Z)-, 3-((6-O-alpha-D-galactopyranosyl-beta-D-galactopyranosyl)oxy)-2-hydroxypropyl ester, (S)-
	MOL002467	6-gingerol
	MOL002483	1-(4-Hydroxy-3-methoxyphenyl)decan-5-one
	MOL002494	6-gingesulfonic acid
	MOL002495	6-shogaol
	MOL002496	Sulcatone
	MOL002516	zingerone
	MOL002522	beta-Rhodinol
	MOL000264	Tereben
	MOL000267	beta-Citronellol
	MOL000268	(1S,5S)-1-isopropyl-4-methylenebicyclo[3.1.0]hexane
	MOL002972	(4S)-1-methyl-4-(6-methylhepta-1,5-dien-2-yl)cyclohexene
	MOL000305	lauric acid
	MOL000358	beta-sitosterol
	MOL003962	Geranyl propionate
	MOL003993	TRIDECANONE
	MOL005151	[(3S)-3,7-dimethylocta-1,6-dien-3-yl] acetate
	MOL005554	i-Butanol
	MOL000608	()-Terpinen-4-ol
	MOL006119	2-methyltridec-1-ene
	MOL006120	8-Gingerol
	MOL006121	Dimethyldiethoxysilane
	MOL006122	HEPTENE
	MOL006123	zingiberol
	MOL006124	elemol
	MOL006125	Gingerdione
	MOL006126	Hexahydrocurcumin
	MOL006127	6-Dehydrogingerdione
	MOL006128	gingerglycolipid)A
	MOL006129	6-methylgingediacetate2
	MOL006130	8-gingerdione
	MOL006131	8-gingerol
	MOL006132	[5]-gingerol
	MOL006133	(E)-1-(4-hydroxy-3-methoxyphenyl)dodec-4-en-3-one
	MOL000635	vanillin
	MOL000066	alloaromadedrene
	MOL000710	OYA
	MOL000774	(-)-Citronellal
	MOL000895	Zingiberene
	MOL000908	beta-elemene
	MOL000912	(2S)-heptan-2-ol
	MOL000918	2-NONANONE
	MOL000920	LINALOOL (D)
	MOL000924	Mnk
	MOL000932	alpha-Farnesene
	MOL000012	Arachic acid
	MOL000018	(+/-)-Isoborneol
	MOL000023	Hemo-sol
	MOL000025	¦Á-Longipinene
	MOL000027	alpha-Curcumene
	MOL000029	beta-Humulene
	MOL000032	beta-Eudesmol
	MOL000034	2-[(1R,3S,4S)-3-isopropenyl-4-methyl-4-vinylcyclohexyl]propan-2-ol
	MOL000035	beta-Selinene
	MOL000037	¦Ã-elemene
	MOL000069	palmitic acid
	MOL000114	vanillic acid
	MOL000121	Decanal
	MOL000125	(-)-alpha-Pinene
	MOL000128	NERYLACETATE
	MOL000130	CAM
	MOL000131	EIC
	MOL000169	alpha-Guaiene
	MOL000171	Guaiol
	MOL000196	L-Bornyl acetate
	MOL000198	(R)-linalool
	MOL000208	()-Aromadendrene
	MOL000209	(1R,3aR,4R,7R)-7-isopropenyl-1,4-dimethyl-1,2,3,3a,4,5,6,7-octahydroazulene
	MOL000244	()-Borneol
	MOL000249	Methylcinnamate
	MOL000252	farnesol
	MOL000253	Styrene, 3,4-dimethyl-
	MOL000254	eugenol
	MOL000257	(-)-beta-Phellandrene
	MOL000259	o-Thymol
	MOL000266	beta-Cubebene
	MOL000271	l-carvone
	MOL000303	caprylic acid
	MOL000432	linolenic acid
	MOL000449	Stigmasterol
	MOL000474	(-)-Epoxycaryophyllene
	MOL000479	Farnesene
	MOL000485	TMH
	MOL000597	Neryl acetate
	MOL000607	Dehydro-p-cymene
	MOL000610	TRD
	MOL000611	beta-Bourbonene
	MOL000612	(-)-alpha-cedrene
	MOL000615	delta-amorphene
	MOL000663	lignoceric acid
	MOL000666	hexanal
	MOL000674	Farnesol acetate
	MOL000676	DBP
	MOL000698	(R)-(-)-alpha-Phellandrene
	MOL000699	m-Cymol
	MOL000700	Nerol
	MOL000703	2-heptanone
	MOL000712	o-Cymol
	MOL000715	l-Menthone
	MOL000776	OXA
	MOL000875	Cedrol
	MOL000899	Furanodiene
	MOL000905	()-beta-Pinene
	MOL000910	Germacron
	MOL000911	Terpilene
	MOL000914	(5S)-1-isopropyl-4-methylbicyclo[3.1.0]hex-3-ene
	MOL000916	Car-3-ene
	MOL000922	(R)-p-Menth-1-en-4-ol
	MOL000926	cis-beta-farnesene
	MOL000933	.gamma.-Bisabolene
	MOL000935	Hepanal
	MOL000936	Germacrene B
	MOL000938	calarene
	MOL000942	(1R,4S,4aR,8aR)-4-isopropyl-1,6-dimethyl-3,4,4a,7,8,8a-hexahydro-2H-naphthalen-1-ol
	MOL000943	epi-10- .gamma.-Eudesmol
	MOL000980	(4S)-4-[(1Z)-1,5-dimethylhexa-1,4-dienyl]-1-methylcyclohexene
	MOL001015	ZINC00388662
	MOL001109	¦Â-thujene
	MOL001123	muurolene
	MOL001129	l-Verbenone
	MOL001168	(1S,2S)-2-isopropenyl-4-isopropylidene-1-methyl-1-vinylcyclohexane
	MOL001179	(&#8722;)-Alloaromadendrene
	MOL001180	¦Ã-muurolene
	MOL001191	(4aR,8aR)-3-isopropylidene-5,8a-dimethyl-1,2,4,4a,7,8-hexahydronaphthalene
	MOL001211	cis-lanceol
	MOL001245	(1S,5R)-7,7-dimethyl-4-bicyclo[3.1.1]hept-3-enecarboxaldehyde
	MOL001285	octanol
	MOL001304	2-ACETYLPYRROLE
	MOL001390	49070_FLUKA
	MOL001417	OCTENAL
	MOL001556	Isocaryophyllene
	MOL001602	1,4-cadinadiene
	MOL001606	BB_NC-0668
	MOL001608	delta-elemene
	MOL001732	IFP
	MOL001771	poriferast-5-en-3beta-ol
	MOL001772	Dihydro-beta-ionone
	MOL001788	adenine
	MOL001843	HBA
	MOL001867	Isovanillin
	MOL001945	Majudin
	MOL002002	cis-Carveol
	MOL002031	toluene
	MOL002046	hexanoic acid
	MOL002085	alpha-Cubebene
	MOL002092	Antioxidant No. 33
	MOL002126	(1S,4R,5R)-1-isopropyl-4-methyl-4-bicyclo[3.1.0]hexanol
	MOL002129	CYCLODODECENE
	MOL002138	p-Cymen-8-ol
	MOL002153	1H-Cycloprop(e)azulen-7-ol, decahydro-1,1,7-trimethyl-4-methylene-, (1aR-(1aalpha,4aalpha,7beta,7abeta,7balpha))-
	MOL002170	(4S,6S)-cis-Carveol
	MOL002186	Aromadendrene oxide 2
	MOL002335	beta-Gurjunene
	MOL002363	beta-Ionone
	MOL002379	PTL
	MOL002453	(-)-Comphene
	MOL002455	[(3S)-3,7-dimethyloct-6-enyl] acetate
	MOL002459	(S)-5-Hydroxy-1-(4-hydroxy-3-methoxyphenyl)-3-tetradecanone
	MOL002468	hexahydrocurcumin
	MOL002472	Neryl propionate
	MOL002475	himachalene
	MOL002478	(2R)-heptan-2-ol
	MOL002482	()-beta-Citronellene
	MOL002484	Isovaleral
	MOL002493	6-gingediol
	MOL002497	(8)-Gingerol
	MOL002504	Peruviol
	MOL002506	Gingerenone A
	MOL002513	Xanthorrhizol
	MOL002526	3691-11-0
	MOL002527	1,2-Dihydrocurcumin
	MOL002528	2,5-Dibutylfuran
	MOL002573	¦Â-patchoulene
	MOL002624	Paradol
	MOL002778	THZ
	MOL002829	trans-p-2-Menthen-1-ol
	MOL002854	(1R,2R,4R)-Dihydrocarveol
	MOL003126	alpha cadinene
	MOL003127	Germacrene D
	MOL003358	Euxanthone
	MOL003393	(1S,4S)-7-isopropylidene-1,4-dimethyl-2,3,4,5,6,8-hexahydro-1H-azulene
	MOL003443	2-Decenal
	MOL003480	Diepicedrene-1-oxide
	MOL003536	T-Cadinol
	MOL003537	T-Muurolol
	MOL003545	aristolene
	MOL003575	¦Á-Panasinsene
	MOL003595	cis-p-2,8-Menthadien-1-ol
	MOL003937	Naphthalene, 1,2,3,4,4a,5,6,8a-octahydro-7-methyl-4-methylene-1-(1-methylethyl)-, (1alpha,4abeta,8aalpha)-
	MOL003978	(3R,6E,10E)-3,7,11,15-tetramethylhexadeca-1,6,10,14-tetraen-3-ol
	MOL003984	2,6-dimethylocta-2,6-diene
	MOL004031	(6S)-1-isopropyl-3-isopropylidene-6-methyl-6-vinylcyclohexene
	MOL004266	ethyl (Z)-3-(4-methoxyphenyl)prop-2-enoate
	MOL004419	globulol
	MOL004480	acetic acid
	MOL004581	[(1R,5S)-7,7-dimethyl-4-bicyclo[3.1.1]hept-3-enyl]methyl acetate
	MOL004671	ISOPULEGOL
	MOL004680	cis-p-2-Menthen-1-ol
	MOL004707	tau-cadinol
	MOL004713	alpha-Eudesmol
	MOL004717	(3R,4aR,8aR)-3-isopropenyl-5,8a-dimethyl-2,3,4,4a,7,8-hexahydro-1H-naphthalene
	MOL004727	(1R,4aR,8aS)-1-isopropyl-7-methyl-4-methylene-2,3,4a,5,6,8a-hexahydro-1H-naphthalene
	MOL004735	CHX
	MOL004776	.alpha.-cis-bergamotene
	MOL004832	WLN: 4OVR
	MOL005075	Rhodinol (6CI)
	MOL005078	(3S)-3,7-dimethyloct-6-enoic acid
	MOL005534	trans-Verbenol
	MOL005577	undecanal
	MOL005743	Proximadiol
	MOL005752	[(4R)-4-isopropenyl-1-cyclohexenyl]methanol
	MOL005899	53111-25-4
	MOL005926	Geranyl formate
	MOL005964	¦Â-panasinsene
	MOL006292	¦Ä-selinene
	MOL007330	MENTHOL
	MOL007521	2-ethenyl-1,1-dimethyl-3-methylene-cyclohexane
	MOL007540	amomumoside_qt
	MOL007548	(1S,4aS,8aS)-7-isopropyl-1,4a-dimethyl-2,3,4,5,6,8a-hexahydronaphthalen-1-ol
	MOL007948	Limene
	MOL008134	amylcyclopropane
	MOL008165	2-Decanone
	MOL008434	gamma-curcumene
	MOL008698	Dihydrocapsaicin
	MOL008990	2-[(1R)-4-methyl-1-cyclohex-3-enyl]propan-2-yl acetate
	MOL009451	.alpha.-Carene
	MOL009549	Ether
	MOL010044	C09628
	MOL010120	(1S,4R,4aR,8aR)-1-isopropyl-4,7-dimethyl-2,3,4,5,6,8a-hexahydro-1H-naphthalen-4a-ol
	MOL010123	ZINC00394787
	MOL010380	()-alpha-Funebrene
	MOL010597	Myrizylalkohol
	MOL010822	ZINC04026824
	MOL010947	(Z)-calamenene
	MOL011148	bergamotene (Z,.alpha.,cis)
	MOL011310	(1R,3S,5R)-6,6-dimethyl-2-methylene-3-norpinanol
	MOL011544	ZINC02140511
	MOL012344	(4aR,9aS)-2,9,9-trimethyl-5-methylene-4,4a,6,7,8,9a-hexahydro-3H-benzo[7]annulene
	MOL012359	3-Cyclohexen-1-methanol
	MOL012409	(2R-cis)-1,2,3,4,4a,5,6,7-Octahydro-alpha,alpha,4a,8-tetramethyl-2-naphthalenemethanol
	MOL012415	1-cis,5-trans Germacrone
	MOL012439	(1Z,4E,8E)-2,6,6,9-tetramethylcycloundeca-1,4,8-triene
	MOL012590	Neric acid
	MOL012774	4-(2,6,6-trimethyl-2-cyclohexen-1-yl)-2-butanone
	MOL013263	.alpha.-Myrcene
	MOL013268	cis-Pinene hydrate
Jujubae Fructus (Da Zao)	MOL011038	(+)-Catechin-5-O-glucoside
	MOL011039	Vaccenic acid
	MOL011543	Zizybeoside I
	MOL012921	stepharine
	MOL012939	Scutianine C
	MOL012940	Spiradine A
	MOL012941	Sylvestrene
	MOL012942	Tannin
	MOL012943	Ziziphin
	MOL012944	Zizyphine A
	MOL012945	Zizyphus saponin III
	MOL012946	zizyphus saponin I_qt
	MOL012947	Zizyphus saponin II
	MOL012948	Zuztvisude I
	MOL012949	(4S)-4-hydroxy-4-[(E,3S)-3-hydroxybut-1-enyl]-3,5,5-trimethylcyclohex-2-en-1-one
	MOL012950	CMP
	MOL012951	PCG
	MOL012952	Daechualkaloid A
	MOL012953	Jubanine-A
	MOL012954	daechuine S3
	MOL012955	24-Dehydrocholesterol
	MOL012956	18658-41-8
	MOL012957	ADA
	MOL012958	jujubasaponin IV
	MOL012959	jujubasaponin IV_qt
	MOL012960	jujuboside A
	MOL012961	jujuboside A_qt
	MOL012962	swertisin
	MOL012963	zizybeoside II
	MOL012964	zizyphus saponin I
	MOL012965	zizyvoside II
	MOL012966	(4R)-4-hydroxy-4-[(E,3S)-3-hydroxybut-1-enyl]-3,5,5-trimethylcyclohex-2-en-1-one
	MOL012967	zizyvoside I
	MOL012968	1-(4-Coumaroyl)alpha-rhamnopyranose
	MOL012969	2¦Á-hydroxyoleanolic acid
	MOL012970	2¦Á-hydroxyursolic acid
	MOL012971	3-O-cis-p-coumaroyl alphitolic acid
	MOL012972	6'-O-p-Coumaroylgenipingentiobioside
	MOL012973	Adouetine X
	MOL012974	Asimilobine
	MOL012975	Catharanthamine
	MOL012976	coumestrol
	MOL012977	Daechuine S10
	MOL012978	Daechuine S26
	MOL012979	Daechuine S5
	MOL012980	Daechuine S6
	MOL012981	Daechuine S7
	MOL012982	Daechuine S8-1
	MOL012983	Jujubasaponin VI
	MOL012984	Jujubasaponin VI_qt
	MOL012985	Jujubasaponin V
	MOL012986	Jujubasaponin V_qt
	MOL012987	Jujubogenin
	MOL012988	Jujuboside A1
	MOL012989	Jujuboside C_qt
	MOL012990	Jujuboside C
	MOL012991	Jujuboside
	MOL012992	Mauritine D
	MOL012993	Mauritine A
	MOL012995	zizyberanalic acid
	MOL001335	WLN: Q1R
	MOL001454	berberine
	MOL001468	MLT
	MOL001501	Daturic acid
	MOL001522	(S)-Coclaurine
	MOL001540	Spinosin
	MOL001551	Trochol
	MOL001739	zoomaric acid
	MOL001841	IES
	MOL001886	Tar
	MOL001952	Sinapyl alcohol
	MOL000211	Mairin
	MOL002307	20-Hexadecanoylingenol
	MOL000261	Myristicin
	MOL000263	oleanolic acid
	MOL002722	Vomifoliol
	MOL002730	Vitamin- G
	MOL002731	(4S)-4-hydroxy-3,5,5-trimethyl-4-[(E,3R)-3-[(2R,3R,4S,5S,6R)-3,4,5-trihydroxy-6-(hydroxymethyl)tetrahydropyran-2-yl]oxybut-1-enyl]cyclohex-2-en-1-one
	MOL000449	Stigmasterol
	MOL003410	Ziziphin_qt
	MOL000356	lupeol
	MOL000358	beta-sitosterol
	MOL003776	oleanonic acid
	MOL000415	rutin
	MOL000042	LPG
	MOL000421	nicotinic acid
	MOL000429	Crystal VI
	MOL004349	Ruvoside
	MOL004350	Ruvoside_qt
	MOL004498	12-O-Nicotinoylisolineolone
	MOL004082	TGL
	MOL000492	(+)-catechin
	MOL000050	GLY
	MOL000511	ursolic acid
	MOL001996	Betulonic acid
	MOL005239	Lysicamine
	MOL000053	Methose
	MOL005360	malkangunin
	MOL005386	Vulgarin
	MOL005390	3-[[(2S)-2,4-dihydroxy-3,3-dimethylbutanoyl]amino]propanoic acid
	MOL005448	Leucinum
	MOL005559	Maslinic acid
	MOL006077	Thiamine
	MOL000061	Prolinum
	MOL000627	Stepholidine
	MOL000628	darutoside
	MOL000065	ASI
	MOL000663	lignoceric acid
	MOL000067	L-Valin
	MOL000675	oleic acid
	MOL006837	spinosin_qt
	MOL006986	Nornuciferine
	MOL007213	Nuciferin
	MOL007341	alphitotic acid
	MOL000749	Linoleic
	MOL000771	p-coumaric acid
	MOL000783	Protoporphyrin
	MOL000787	Fumarine
	MOL008032	(1S,2R,4aS,6aR,6aS,6bR,8aR,12aR,14bS)-1,2,6a,6b,9,9,12a-heptamethyl-10-oxo-1,2,3,4,5,6,6a,7,8,8a,11,12,13,14b-tetradecahydropicene-4a-carboxylic acid
	MOL008034	21302-79-4
	MOL000842	sucrose
	MOL008647	Moupinamide
	MOL002773	beta-carotene
	MOL000089	catechol
	MOL000096	(-)-catechin
	MOL000098	quercetin
	MOL000069	palmitic acid
	MOL000357	Sitogluside
	MOL000734	GLO
	MOL004550	Pomolic acid
	MOL005508	Glucosol
	MOL008029	N-(2'-hydroxytetraeosanol)-2-amino-8-octadecene-1,3,4-triol
	MOL013357	(3S,6R,8S,9S,10R,13R,14S,17R)-17-[(1R,4R)-4-ethyl-1,5-dimethylhexyl]-10,13-dimethyl-2,3,6,7,8,9,11,12,14,15,16,17-dodecahydro-1H-cyclopenta[a]phenanthrene-3,6-diol
