# Supplementary material for: Exploring the Possible Mechanism and Drug Targets of Huang-Qi-Gui-Zhi-Wu-Wu Decoction for the Treatment of Chemotherapy-Induced Peripheral Neuropathy on Network Pharmacology
Source: Evid Based Complement Alternat Med. 2020 Nov 22;2020:2363262. doi: 10.1155/2020/2363262 (PMC7704154; doi:10.1155/2020/2363262)
Supplement: Supplementary Materials — Supplementary 1. Table S1: compounds identified in the HQGZWWD formula. Supplementary 2. Table S2: effective compounds identified in the HQGZWWD formula. Supplementary 3. Table S3: targets of the HQGZWWD formula. Supplementary 4. Table S4: targets of CIPN. [file 2363262.f1.zip › 2363262.f1/Supplementary Materials S2.txt]

Effective compounds identified in the HQGZWWD formula
Compounds	Oral Bioavailability (%)	Drug-likeness
Mairin	55.38	0.78
Jaranol	50.83	0.29
Hederagenin	36.91	0.75
(3S,8S,9S,10R,13R,14S,17R)-10,13-dimethyl-17-[(2R,5S)-5-propan-2-yloctan-2-yl]-2,3,4,7,8,9,11,12,14,15,16,17-dodecahydro-1H-cyclopenta[a]phenanthren-3-ol	36.23	0.78
Isorhamnetin	49.60	0.31
3,9-di-O-methylnissolin	53.74	0.48
5'-hydroxyiso-muronulatol-2',5'-di-O-glucoside	41.72	0.69
7-O-methylisomucronulatol	74.69	0.30
9,10-dimethoxypterocarpan-3-O-��-D-glucoside	36.74	0.92
(6aR,11aR)-9,10-dimethoxy-6a,11a-dihydro-6H-benzofurano[3,2-c]chromen-3-ol	64.26	0.42
Bifendate	31.10	0.67
Formononetin	69.67	0.21
Isoflavanone	109.99	0.30
Calycosin	47.75	0.24
Kaempferol	41.88	0.24
FA	68.96	0.71
(3R)-3-(2-hydroxy-3,4-dimethoxyphenyl)chroman-7-ol	67.67	0.26
Isomucronulatol-7,2'-di-O-glucosiole	49.28	0.62
1,7-Dihydroxy-3,9-dimethoxy pterocarpene	39.05	0.48
Quercetin	46.43	0.28
(-)-taxifolin	60.51	0.27
Beta-sitosterol	36.91	0.75
Sitosterol	36.91	0.75
(+)-catechin	54.83	0.24
Ent-epicatechin	48.96	0.24
Taxifolin	57.84	0.27
Peroxyergosterol	44.39	0.82
11alpha,12alpha-epoxy-3beta-23-dihydroxy-30-norolean-20-en-28,12beta-olide	64.77	0.38
Paeoniflorgenone	87.59	0.37
(3S,5R,8R,9R,10S,14S)-3,17-dihydroxy-4,4,8,10,14-pentamethyl-2,3,5,6,7,9-hexahydro-1H-cyclopenta[a]phenanthrene-15,16-dione	43.56	0.53
Lactiflorin	49.12	0.80
Paeoniflorin	53.87	0.79
Paeoniflorin_qt	68.18	0.40
Albiflorin_qt	66.64	0.33
Benzoyl paeoniflorin	31.27	0.75
Stepharine	31.55	0.33
Spiradine A	113.52	0.61
Zizyphus saponin I_qt	32.69	0.62
Jujuboside A_qt	36.67	0.62
Coumestrol	32.49	0.34
Daechuine S6	46.48	0.79
Daechuine S7	44.82	0.83
Jujubasaponin V_qt	36.99	0.63
Jujuboside C_qt	40.26	0.62
Mauritine D	89.13	0.45
berberine	36.86	0.78
(S)-Coclaurine	42.35	0.24
Stigmasterol	43.83	0.76
Ziziphin_qt	66.95	0.62
Ruvoside_qt	36.12	0.76
Malkangunin	57.71	0.63
Stepholidine	33.11	0.54
Nuciferin	34.43	0.40
Protoporphyrin	30.86	0.56
Fumarine	59.26	0.83
Ceanothic acid	33.41	0.77
Moupinamide	86.71	0.26
Beta-carotene	37.18	0.58
(-)-catechin	49.68	0.24
(3S,6R,8S,9S,10R,13R,14S,17R)-17-[(1R,4R)-4-ethyl-1,5-dimethylhexyl]-10,13-dimethyl-2,3,6,7,8,9,11,12,14,15,16,17-dodecahydro-1H-cyclopenta[a]phenanthrene-3,6-diol	34.37	0.78
6-methylgingediacetate2	48.73	0.32
Poriferast-5-en-3beta-ol	36.91	0.75
Dihydrocapsaicin	47.07	0.19
