# Supplementary material for: Exploring the Possible Mechanism and Drug Targets of Huang-Qi-Gui-Zhi-Wu-Wu Decoction for the Treatment of Chemotherapy-Induced Peripheral Neuropathy on Network Pharmacology
Source: Evid Based Complement Alternat Med. 2020 Nov 22;2020:2363262. doi: 10.1155/2020/2363262 (PMC7704154; doi:10.1155/2020/2363262)
Supplement: Supplementary Materials — Supplementary 1. Table S1: compounds identified in the HQGZWWD formula. Supplementary 2. Table S2: effective compounds identified in the HQGZWWD formula. Supplementary 3. Table S3: targets of the HQGZWWD formula. Supplementary 4. Table S4: targets of CIPN. [file 2363262.f1.zip › 2363262.f1/Supplementary Materials S3.txt]

Targets of the HQGZWWD formula
Name	Compounds	Targets
Hedysarum Multijugum Maxim (Huang Qi)	Mairin	LSS
		PRLR
		SLC22A1
		SLC22A3
		CYP1A1
		CYP11A1
		PGR
		NR3C2
		CYP2C8
		CYP2D6
		CYP2C9
		CYP3A5
		MAOA
		CYP2C19
		CYP2J2
		AKR1C1
		NCOA2
		CYP1B1
		CYP2A13
		SLC10A6
		SLC22A4
		CYP3A43
		ABCG2
		ABCC3
		ABCC4
		ADH1C
		PLA2G1B
		NR3C1
		CYP2E1
		ABCB1
		SERPINA6
		GSTP1
		CES1
		ABCC1
		FABP6
		AKR1C2
		ESRRG
		SLC10A1
		FECH
		EFTUD1
		NR1H4
		SLCO1B3
		SLC22A7
		SLCO1B1
		MPO
		RXRA
		HSD11B2
		HSD11B1
		CYP27A1
		CYP2R1
		UGT1A4
		NCOA1
		ALB
		SHBG
		CYP19A1
		CYP2B6
		SLCO1A2
		SLC22A8
		GC
		HOXA10
		ABCB11
		ABCC2
		SULT2B1
		GABRP
		GABRD
		GRIN2D
		GRIN3B
		NR1I2
		ESR1
		CYP3A4
		AR
		HSD17B1
		GABRA1
		GABRB1
		GABRG2
		CYP3A7
		GABRB3
		GABRA5
		GABRA3
		GABRA2
		GABRB2
		GABRA4
		GABRE
		GRIN1
		SULT2A1
		PPARA
		GRIN2A
		GRIN2B
		GRIN2C
		NR1I3
		GABRA6
		GABRG1
		GRIN3A
		ESR2
		SIGMAR1
		GABRG3
		GABRQ
		CYP27B1
		VDR
		CYP24A1
		NOS2
		ACHE
		RIPK2
		NR2F2
		CHRM4
		SRD5A2
		S1PR2
		CHRM1
		CYP17A1
		CDC25B
		CHRM2
		CA5A
		TUBB2B
		CES2
		S1PR5
		CHRM5
		TLR9
		STS
		APOBEC3A
		SRD5A1
		CHRM3
		ACE
		ALOX15
		FDFT1
		HTR1E
		ADRA2C
		PREP
		PTGS1
		GPR35
		GALR3
		CA5B
		MTHFD1
		METAP2
		CDK2
		MMP3
		FABP3
		DHODH
		IL2
		RARG
		GSTA1
		GSK3B
		ABO
		KIF11
		BACE1
		WAS
		HMGCR
		FKBP1A
		CA2
		LCN2
		CHEK1
		EPHX2
		SEC14L2
		CTSB
		PROCR
		ADK
		TNKS
		F2
		TTPA
		ITGAL
		MAPK14
		MMP12
	Jaranol	CDK6
		NR1I2
		ESRRB
		TTR
		ESR1
		SHBG
		CYP1A2
		ABCB1
		TOP2A
		ESRRA
		AKT1
		PTK2B
		NCOA2
		NCOA1
		CYP1B1
		ESR2
		GPER
		ABCG2
		EIF3F
		SLC16A7
		STK17B
		SLCO2B1
		ALB
		ATP5B
		HSP90AA1
		HCK
		CYP2C8
		PIM1
		NQO2
		CBR1
		CEBPB
		UBA1
		JAK1
		ATP5A1
		ABCC1
		AHR
		ATP5C1
		PIK3CG
		SLC16A1
		HSPA2
		ACTB
		CSNK2B
		CSNK2A1
		SF3B3
		UGT3A1
		HIBCH
		ABCC2
		RUVBL2
		SOAT2
		SOAT1
		MTTP
		AR
		CALM3
		DPP4
		PTGS1
		PTGS2
		HSP90AB1
		NOS2
		CHEK1
		PRSS1
		SCN5A
		PTPN22
		ALOX5
		DUSP3
		BCL2A1
		TUBA1A
		AKR1B1
		TLR9
		PTPN1
		NR2E3
		PTPN7
		CTDSP1
		MCL1
		GSK3B
		RORA
		CYP2C9
		GPR35
		DNMT1
		MAPK10
		RIPK2
		IMPDH2
		XDH
		RAC1
		THRA
		TUBB2B
		S1PR1
		RELA
		CYP19A1
		CA5A
		MAOB
		CA12
		MAOA
		MIF
		ALOX15
		CA7
		HSD17B1
		RPS6KA3
		CA13
		TERT
		DYRK1A
		CA5B
		CA4
		CA6
		HSD17B2
		HSD17B3
		NT5M
		ANG
		SRC
		FGFR1
		DHODH
		MMP12
		F11
		ABO
		DCK
		BHMT
		CA2
		F2
		UCK2
		AKR1C3
		CCNA2
		HRAS
		SELE
		GSTM2
		BACE1
		FKBP1A
		NR1H4
		FKBP3
		GMPR2
		KDR
	Hederagenin	NR3C1
		NR3C2
		AR
		GC
		CYP3A4
		VDR
		HOXA10
		HSD11B2
		CYP24A1
		SLCO2B1
		ABCB11
		HMGCR
		ABCB1
		CYP2C8
		CYP2D6
		CYP2C9
		CYP3A5
		CES1
		HSD11B1
		SLCO1A2
		SLC16A1
		NCOA1
		SLC22A6
		SLC22A8
		ABCC2
		SLCO1B3
		SLC22A11
		ABCG2
		SLC22A7
		SLCO1B1
		NR1I2
		ANXA1
		CYP1A1
		CYP17A1
		CYP11A1
		CYP2E1
		CYP2A6
		CYP19A1
		CYP2B6
		CYP3A7
		CYP2C19
		NOS2A
		NR0B1
		CYP4A11
		CYP1B1
		CYP3A43
		ALB
		SHBG
		SERPINA6
		HSD3B1
		CYP11B1
		CYP11B2
		NCOA6
		CHRM3
		PGR
		CHRM1
		GABRA2
		GABRA3
		CHRM2
		ADRA1B
		GABRA1
		GRIA2
		GABRA6
		GABRA5
		IGHG1
		PTGS1
		PTGS2
		ADH1C
		LYZ
		SCN5A
		RXRA
		PDE3A
		SLC6A2
		PTPN2
		ACHE
		NOS2
		RIPK2
		SRD5A2
		APOBEC3A
		SRD5A1
		STS
		GPR35
		CYP1A2
		CHRM4
		TRAPPC3
		MAP2K1
		TNKS
		SULT2A1
		ADH5
		MME
		NR1H2
		MMP3
		CA2
		PTPN1
		GSTP1
		SORD
		RARB
		GSTA1
		REN
		MAPK1
		HDAC8
		F2
		HSD17B1
		MMP13
		PPP1CC
		ESR1
		CHEK1
		PRKACA
		TTR
		LCK
		IGF1
		PLA2G2A
		IL2
		HSP90AA1
		CDK2
		BACE1
		HNF4G
		MTAP
		MAPK10
	(3S,8S,9S,10R,13R,14S,17R)-10,13-dimethyl-17-[(2R,5S)-5-propan-2-yloctan-2-yl]-2,3,4,7,8,9,11,12,14,15,16,17-dodecahydro-1H-cyclopenta[a]phenanthren-3-ol	ALB
		ESR1
		SHBG
		PGR
		ABCB1
		CYP3A4
		CYP3A5
		CYP3A7
		CYP2C19
		NR3C1
		SERPINA6
		CYP27B1
		GC
		VDR
		RXRA
		HOXA10
		CYP24A1
		SULT2B1
		GABRP
		GABRD
		GRIN2D
		GRIN3B
		NR1I2
		AR
		HSD17B1
		GABRA1
		GABRB1
		GABRG2
		GABRB3
		GABRA5
		GABRA3
		GABRA2
		GABRB2
		GABRA4
		GABRE
		GRIN1
		SULT2A1
		PPARA
		GRIN2A
		GRIN2B
		GRIN2C
		NR1I3
		GABRA6
		GABRG1
		GRIN3A
		ESR2
		SIGMAR1
		GABRG3
		GABRQ
		SLC22A1
		SLC22A3
		CYP1A1
		CYP11A1
		NR3C2
		CYP2C8
		CYP19A1
		CYP2C9
		CYP2B6
		MAOA
		SLCO1A2
		AKR1C2
		AKR1C1
		SLC10A1
		NCOA2
		CYP1B1
		CYP2A13
		SLC10A6
		SLC22A8
		SLC22A4
		CYP3A43
		ABCG2
		SLC22A7
		CYP27A1
		CYP2R1
		UGT1A4
		CYP2D6
		CYP2J2
		RORA
		CLEC4E
		LSS
		SRD5A2
		CYP17A1
		NOS2
		SRD5A1
		CDC25B
		HTR1E
		ALOX15
		STS
		S1PR2
		ACHE
		CYP1A2
		CHRM4
		RIPK2
		PTGS1
		ADRA2B
		TLR9
		CHRM3
		NR1H4
		TRAPPC3
		SEC14L2
		BACE1
		ABL1
		RXRG
		BLVRB
		ADAM17
		MAPK14
		HDAC8
		F2
		CALM3
		HSP90AB1
		AKR1B1
		CDK2
		PIK3R1
		MAPK10
		METAP2
		MAOB
		TNKS
		HSD11B1
		TTPA
		KDR
		ITGAL
		FECH
		RBP4
	Isorhamnetin	IGHG1
		COMT
		CDK6
		NR1I2
		ESRRB
		TTR
		ESR1
		SHBG
		CYP1A2
		ABCB1
		TOP2A
		ESRRA
		AKT1
		ABCC1
		PTK2B
		NCOA2
		NCOA1
		CYP1B1
		ESR2
		GPER
		ABCG2
		EIF3F
		SLC16A7
		STK17B
		SLCO2B1
		ALB
		ATP5B
		HSP90AA1
		HCK
		CYP2C8
		PIM1
		NQO2
		CBR1
		CEBPB
		UBA1
		JAK1
		ATP5A1
		AHR
		ATP5C1
		PIK3CG
		SLC16A1
		HSPA2
		ACTB
		CSNK2B
		CSNK2A1
		SF3B3
		UGT3A1
		HIBCH
		ABCC2
		RUVBL2
		SOAT2
		SOAT1
		MTTP
		NOS2
		PTGS1
		AR
		PTGS2
		PPARG
		PTPN1
		DPP4
		MAPK14
		GSK3B
		HSP90AB1
		PRSS1
		CALM3
		CCNA2
		PYGM
		PPARD
		CHEK1
		F7
		NOS3
		ACHE
		GABRA1
		MAOB
		GRIA2
		RELA
		XDH
		NCF1
		OLR1
		PTPN22
		DUSP3
		TUBB2B
		BCL2A1
		TUBA1A
		TLR9
		MCL1
		CTDSP1
		RORA
		TERT
		MAPK10
		IMPDH2
		GPR35
		CYP2C9
		DNMT1
		NR2E3
		PTPN7
		S1PR1
		CYP19A1
		CA5A
		CA12
		MAOA
		MIF
		ALOX15
		HTR1E
		CA7
		HSD17B1
		ALOX5
		RPS6KA3
		CA13
		RAC1
		CA6
		ALPL
		HSD17B2
		HSD17B3
		FGFR1
		NT5M
		HSPA8
		ANG
		SRC
		CTSF
		HEXB
		UMPS
		UAP1
		F2
		GMPR
		GSTT2
		REN
		CASP1
		UCK2
		EPHA2
		BACE1
		TYMS
		FABP4
		FKBP3
		CA2
		FKBP1A
		APRT
		SELE
		CD209
		KDR
		CTSS
		SORD
		GSTP1
		BHMT
		F11
		GSR
		RAB5A
		DCK
		ELANE
		PDPK1
		ARHGAP1
		CTSK
		DHODH
		PRKACA
		GSTA3
		NMNAT1
	3,9-di-O-methylnissolin	NOS2A
		PTGS1
		CHRM3
		CHRM1
		ESR1
		ADRB1
		PTGS2
		SCN5A
		NOS3
		HTR3A
		ADRA2C
		RXRA
		PDE3A
		ACE
		ADRA1B
		ADRB2
		ADRA1D
		PRSS1
		GABRA1
		CALM3
		NCOA2
		NOS2
		OPRM1
		ABCB1
		EDNRA
		NR3C2
		ESR2
		HRH1
		EDNRB
		PTPN1
		ADRA2B
		DUSP3
		ADRA1A
		DRD5
		PPARD
		ADRA2A
		MIF
		HTR1E
		HTR1B
		AHR
		HTR2C
		HTR6
		DRD1
		TUBB2B
		ABCG2
		HTR7
		TUBA1A
		ALOX5
		FFAR1
		PPARG
		SLC6A4
		PPARA
		MSD1
		GLO1
		FKBP3
		PRKACA
		MME
		CA2
		REN
		CTNNA1
		AR
		PIM1
		MAPK10
		MMP9
		AKR1C3
		THRB
		FKBP1A
		CYP2C9
		AMD1
		GSTP1
		AKR1B1
		ELANE
		ADAM17
		HSD11B1
		PGR
		CDK2
		GSK3B
		ABO
		METAP2
		HNMT
		ADAM33
		DCK
		HSP90AA1
		HPGDS
	7-O-methylisomucronulatol	NOS2
		PTGS1
		DRD1
		CHRM3
		KCNH2
		CHRM1
		ESR1
		AR
		ADRB1
		PPARG
		SCN5A
		F10
		CHRM5
		PTGS2
		ADRA2C
		NOS3
		RXRA
		CHRM4
		OPRD1
		PDE3A
		HTR2A
		ADRA1A
		CHRM2
		ADRA1B
		SLC6A3
		ADRB2
		ADRA1D
		SLC6A4
		ESRRB
		GABRA1
		DPP4
		MAPK14
		GSK3B
		HSP90AB1
		CHEK1
		PRKACA
		PRSS1
		RXRB
		PIM1
		CCNA2
		NCOA2
		KCNMA1
		CALM3
		CDK2
		ESR2
		HTR1A
		TUBB2B
		ADRA2B
		DRD5
		CYP19A1
		DRD2
		ADRA2A
		MAOA
		ALOX15
		HTR1B
		HTR2C
		HTR6
		ABCG2
		RORA
		HTR7
		HSD17B1
		TUBA1A
		ALOX5
		CYP1A2
		MAOB
		ABCC1
		MIF
		DUSP3
		SIGMAR1
		HTR1E
		ACHE
		MTNR1B
		TLR9
		STS
		MTNR1A
		S1PR2
		HTR3A
		APOBEC3A
		GALR3
		APOBEC3G
		SLC6A2
		LTB4R
		LCK
		HCK
		PAH
		HPGDS
		OAT
		NQO2
		FGFR1
		ADH1C
		CDK6
		ESRRG
		BACE1
		MET
		MME
		ALB
		GCK
		ELANE
		PTPN1
		BHMT
		FKBP1A
		MMP3
		PNMT
		PCK1
		EIF4E
		DCPS
		NR3C1
		METAP2
		CA2
		PADI4
		ABL1
		GSTA1
		HSD11B1
	9,10-dimethoxypterocarpan-3-O-��-D-glucoside	TOP2A
		PTGS2
		NCOA2
		SLC5A2
		SLC5A1
		PDE3A
		DNMT1
		EDNRB
		PTPN1
		CRHR1
		CNR1
		PTAFR
		AKR1B1
		ALK
		TUBB2B
		ADRA2B
		PGR
		CNR2
		OPRK1
		OPRM1
		IGF1R
		KCNA5
		PIK3CG
		MET
		MAPKAPK2
		EDNRA
		PTGDR
		ADRA2A
		TYK2
		DRD1
		ACHE
		CYP3A4
		OXTR
		PLK1
		PLA2G1B
		NR3C2
		F10
		NR3C1
		PDE4B
		PTPN7
		ADRA2C
		BCL2
		HSP90AA1
		TUBA1A
		PLIN1
		CYP2C9
		ELANE
		SERPINE1
		PPARG
		MDM2
		AURKA
		PDE4A
		FYN
		LSS
		AMD1
		DHODH
		ABO
		HEXB
		DHFR
		SERPINA1
		CA2
		GNPDA1
		B3GAT1
		PRKACA
		KAT2B
		PYGL
		PIM1
		HNMT
		HK1
		BST1
		UAP1
		SOD2
		GP1BA
		CHIT1
		LCK
		FKBP3
		BACE1
		FKBP1A
		MAPK14
		CDK2
		HADH
		CCNA2
		HSD11B1
		PPARA
		IMPA1
		SETD7
		GALK1
		KDR
		MAN1B1
		GSTP1
		ACADM
		CD209
		IGF1
		GLO1
		F11
		TNK2
		NOS2
		GBA
		CTSK
		TGM3
		HCK
		GSTM2
		SORD
		AMY2A
		MMP13
		ACPP
		ADAM17
		CHEK1
	(6aR,11aR)-9,10-dimethoxy-6a,11a-dihydro-6H-benzofurano[3,2-c]chromen-3-ol	HTR3A
		ACHE
		ADRA1B
		ADRA1D
		ADRB2
		HSP90AB1
		GABRA1
		ESR1
		CHRM1
		CHRM3
		CHRM4
		CHRNA7
		NOS2
		NCOA1
		NCOA2
		PTGS1
		PTGS2
		RXRA
		PRSS1
		CALM3
		SCN5A
		ESR2
		DRD1
		ABCB1
		NR3C2
		EDNRA
		PTPN1
		ADRA1A
		TUBB2B
		ADRA2B
		HRH1
		DRD5
		PPARD
		DRD2
		CNR2
		ADRA2A
		MIF
		ALOX15
		HTR1B
		AHR
		HTR6
		ABCG2
		ADRA2C
		HSD17B1
		TUBA1A
		ALOX5
		PPARG
		CA6
		PPARA
		HNMT
		GLO1
		PRKACA
		AR
		ESRRG
		FKBP3
		DCK
		CTNNA1
		CA2
		REN
		MME
		NR1H4
		MMP9
		MTAP
		HSD11B1
		GSK3B
		MAPK10
		CYP2C9
		AKR1C3
		THRB
		SOD2
		ELANE
		F11
		AKR1B1
		FKBP1A
		CDK2
		ADAM17
		PIM1
		CCNA2
		GSTP1
		ADAM33
		METAP2
		PNMT
		ABO
		HSP90AA1
		SHBG
		MMP3
		SORD
		HDAC8
		HPGDS
		DPP4
		NR1I2
		DHODH
		AMD1
		CDA
		HPN
		MAOB
		BIRC7
		SULT2A1
		CASP7
		CTSD
		TGFBR1
		PNP
		EGFR
		AMY2A
		F10
		EPHB4
		MAPK14
		KDR
		CTSK
		UCK2
		CHEK1
		BACE1
		GSR
		CFD
		ABL1
		HSPA8
		IGF1R
		SETD7
	Bifendate	PTGS1
		PTGS2
		KDR
		MET
		HSP90AB1
		KCNMA1
		TUBB2B
		TUBA1A
		DRD1
		EDNRA
		DHODH
		ABCB1
		ALOX5
		S1PR1
		DUSP3
		PTPN1
		MCL1
		RIPK2
		PTGER1
		PTPRC
		ESR1
		PTK2
		RAC1
		RELA
		ESR2
		HTR4
		MIF
		ACHE
		ALOX15
		CTDSP1
		AHR
		APOBEC3A
		NR2E3
		DYRK1A
		CASP9
		BCL2A1
		ABCG2
		RORA
		CA7
		NR2F2
		PTPN7
		GPR35
		ALPL
		ANG
		PIM1
		CTSB
		CDK2
		RNASE3
		CLK1
		CYP2C9
		AKR1B1
		CCNA2
		AMD1
		REN
		CDA
		BTK
		DHFR
		ISG20
		FKBP1A
		BST1
		RAB5A
		PCK1
		ELANE
		DTYMK
		DCK
		MMP3
		AMY2A
		SRC
		SULT2A1
		TPI1
		FGFR1
		CA2
		GSTP1
		GPI
		SPR
		F2
		HAGH
		PRKACA
		MAN1B1
		ATIC
		APAF1
		FGG
		ABO
		IMPDH2
		BHMT
		HPRT1
		AR
		CASP1
		F7
		CFD
		LCK
		TGFB2
		DDX6
		F11
		CTSG
		AKT1
		KIF11
	Formononetin	NR1I2
		ESRRB
		IGHG1
		TTR
		ESR1
		ABCB1
		TOP2A
		ESRRA
		AKT1
		ABCC1
		PTK2B
		NCOA2
		NCOA1
		CYP1B1
		ESR2
		GPER
		SOAT2
		SHBG
		CYP1A2
		SOAT1
		MTTP
		ABCG2
		CDK6
		UGT3A1
		HSD3B1
		ADRA1A
		AR
		ATP5B
		MAOB
		CALM3
		KCNMA1
		ATP5F1B
		ADRB2
		PDE3A
		PKIA
		CCNA2
		DPP4
		GSK3B
		HSP90AB1
		IL4
		MAPK14
		CHRM1
		SIRT1
		NOS2
		NOS3
		PPARG
		PTGS1
		PTGS2
		PIM1
		RXRA
		CHEK1
		SLC6A3
		SLC6A4
		PRSS1
		RAC1
		TUBB2B
		RELA
		CYP19A1
		MAOA
		MIF
		ALOX15
		HTR1E
		RORA
		HSD17B1
		TUBA1A
		AKR1B1
		CA6
		TLR9
		HSD17B2
		ALOX5
		XDH
		DUSP3
		APP
		AHR
		CA12
		ALPL
		CA9
		TERT
		CA7
		CYP17A1
		CTDSP1
		NR2F2
		MMP12
		PTGES
		CA5A
		CA14
		RIPK2
		CA13
		S1PR2
		BCL2A1
		CA5B
		HTR6
		GPR35
		CA4
		HCAR2
		CYP11B2
		GALR3
		S1PR4
		STS
		ESRRG
		CA2
		NR1H4
		PCK1
		ELANE
		MET
		GSTA1
		SHMT1
		ANG
		CYP2C9
		ALDH2
		DCK
	Calycosin	NOS2
		PTGS1
		ESR1
		AR
		PTGS2
		PPARG
		RXRA
		PDE3A
		ESR2
		DPP4
		MAPK14
		GSK3B
		HSP90AB1
		CHEK1
		PRSS1
		PIM1
		CCNA2
		NCOA2
		CALM3
		ADRB2
		CYP1A2
		TUBB2B
		RELA
		CYP19A1
		XDH
		MAOB
		MAOA
		MIF
		ALOX15
		AHR
		ABCG2
		HSD17B1
		TUBA1A
		AKR1B1
		CA13
		RAC1
		CA6
		TLR9
		HSD17B2
		ALOX5
		DUSP3
		ACHE
		CA5A
		RORA
		BCL2A1
		NR2F2
		CTDSP1
		TERT
		HTR1E
		CA7
		ABCB1
		CA4
		S1PR2
		DYRK1A
		RIPK2
		HTR2C
		S1PR1
		ADRA2C
		GPR35
		S1PR4
		SHBG
		KAT2B
		ESRRG
		SRC
		NR1H4
		MME
		CA2
		UCK2
		CDK6
		ABO
		ELANE
		OAT
		SELE
		CDK7
		CYP2C9
		ADAM17
		GSTA1
		KIT
		PGR
		HPGDS
		SULT2A1
		FGFR1
		ALB
		SHMT1
		CBR1
		BACE1
		FKBP1A
		PRKACA
		GPI
		RAB5A
		NR3C1
		MTAP
		KDR
		PCK1
		MET
		GSTP1
		DTYMK
		DCK
		GART
	Kaempferol	CA12
		CA1
		CA2
		CYP1A1
		CYP2E1
		PRKCB
		CA3
		PRKCA
		PRKACA
		CA4
		CA6
		CA5A
		CA7
		SYK
		SQLE
		CA9
		SLC22A6
		SLC22A11
		CA14
		CA5B
		SOAT2
		SOAT1
		MTTP
		CYP19A1
		AKR1C1
		KIAA1310
		IGHG1
		COMT
		CDK6
		ESRRB
		TTR
		CYP1A2
		TOP2A
		ESRRA
		AKT1
		PTK2B
		NCOA2
		NCOA1
		GPER
		EIF3F
		SLC16A7
		NR1I2
		STK17B
		SLCO2B1
		ALB
		ESR1
		SHBG
		ATP5B
		HSP90AA1
		ABCB1
		HCK
		CYP2C8
		PIM1
		NQO2
		CBR1
		CEBPB
		UBA1
		JAK1
		ATP5A1
		ABCC1
		AHR
		ATP5C1
		PIK3CG
		SLC16A1
		HSPA2
		ACTB
		CSNK2B
		CSNK2A1
		SF3B3
		CYP1B1
		HIBCH
		ESR2
		ABCC2
		ABCG2
		RUVBL2
		UGT3A1
		PTGS1
		PTGS2
		AR
		NOS2
		PPARG
		HSP90AB1
		DPP4
		PRSS1
		PGR
		CHRM1
		NOS3
		GABRA2
		ACHE
		SLC6A2
		CHRM2
		ADRA1B
		GABRA1
		CALM3
		TOP2
		F7
		RELA
		IKBKB
		BCL2
		BAX
		TNF
		JUN
		AHSA1
		CASP3
		MAPK8
		XDH
		MMP1
		STAT1
		HMOX1
		CYP3A4
		ICAM1
		SELE
		VCAM1
		ALOX5
		HAS2
		GSTP1
		PSMD3
		SLC2A4
		NR1I3
		INSR
		DIO1
		PPP3CA
		GSTM1
		GSTM2
		AKR1C3
		SLPI
		NT5M
		SRC
		HSD17B1
		CDK2
		MAPK14
		F11
		FKBP3
		CCNA2
		FKBP1A
		HEXB
		UCK2
		BHMT
		DCK
		F2
		GSR
		PDPK1
		GSK3B
		FGFR1
		ABO
		ELANE
		KDR
	FA	ABCB1
		ABCC1
		SLCO1A2
		SLC16A1
		SLCO4C1
		SLC22A8
		SLCO1B3
		SLC22A11
		SLCO1C1
		SLC22A7
		SLCO1B1
		NQO2
		TYMS
		GART
		DCK
		DHFR
		MTHFD1
		MTHFD2
		ATIC
		SHMT1
		ABCC2
		MTFMT
		MTR
		ABCC3
		ABCC4
		ALB
		CYP2E1
		MTHFR
		SLC22A6
		ABCG2
		GSK3B
		ITGAV
		ABL1
		PTPRC
		HCRTR1
		JAK2
		FOLH1
		ITGA2B
		CYP2C9
		MAOB
		PTPN1
		GSR
		ARHGAP1
		CDC42
		SULT2B1
		RAN
		PAPSS1
		CDK7
		LCK
		TPSB2
		ARL5A
		MAPK12
		HPGDS
		MMP3
		AGXT
		HADH
		B3GAT1
		PMS2
		GSTP1
		MAPK10
		NMNAT1
		GSTA3
		TK1
		SRC
		RHOA
		MME
		DTYMK
		THRB
		ADH5
		AKR1B1
		CSNK2A1
		ITPKA
		KIF5A
		GSTZ1
		HMGCR
		KIT
		RNASE3
		PSPH
		ME2
		PCK1
		HNF4G
		PTN
		CASP3
		GSTA1
		PLA2G2A
		FABP4
		EIF4E
		TGM3
		IMPA1
		AMY2A
		NME2
		TPI1
		HAGH
		TTR
		HSP90AA1
		F2
		ANG
	(3R)-3-(2-hydroxy-3,4-dimethoxyphenyl)chroman-7-ol	ESR1
		ADRA2B
		DRD5
		CYP19A1
		ESR2
		ADRA2A
		PTGS1
		MIF
		ALOX15
		HTR1B
		HTR6
		DRD1
		TUBB2B
		ABCG2
		HSD17B1
		ADRA2C
		TUBA1A
		HTR2C
		HTR1A
		HTR7
		MAOA
		STS
		MAOB
		ADRA1A
		SIGMAR1
		ALOX5
		DRD2
		TLR9
		CYP1A2
		HTR1E
		DUSP3
		HTR2A
		ABCB1
		RORA
		CA4
		HTR3A
		SLC6A4
		LCK
		HCK
		YARS
		DHFR
		PAH
		HPGDS
		MAPK14
		OAT
		NQO1
		NQO2
		UCK2
		CDK2
		CDK6
		ESRRG
		FGFR1
		MMP8
		ADH1C
		BACE1
		ADH5
		MET
		PKIA
		DPP4
		MME
		FKBP1A
		CCNA2
		PTPN1
		CYP2C9
		PCK1
		HSP90AA1
		ALB
		MMP3
		ELANE
		SHBG
		NOS3
		PNMT
		CASP3
		CA2
		CASP7
		NOS2
		KDR
		EIF4E
	Isomucronulatol-7,2'-di-O-glucosiole	TOP2
		SLC5A2
		SLC5A1
		DRD1
		PTPN1
		ABCB1
		TUBB2B
		ADRA2B
		PTGIR
		OPRK1
		KCNA5
		PPARD
		CNR2
		EDNRA
		ADRA2A
		PTGS1
		ACHE
		EDNRB
		CYP3A4
		NR3C2
		NR3C1
		PDE4B
		TOP1
		ADRA2C
		TUBA1A
		PPARG
		PDE4A
		CNR1
		CLEC4A
		GP1BA
		ABO
		DHFR
		HSP90AA1
		PAH
		HEXB
		AKR1B1
		HADH
		ANG
		SERPINA1
		TADA3
		AMY2A
		CCL5
		CHIT1
		PYGL
		GPI
		REN
		MMP13
		AMD1
		RAC1
		BACE1
		SELE
		FKBP3
		LSS
		MTHFD1
		TYMS
		F2
		HSPA8
		FKBP1B
		FKBP1A
		DTYMK
		CA2
		ALB
		RAN
		CTSK
		CASP3
		UCK2
		TGM3
		GSTZ1
		EIF4E
		GALK1
		CMA1
		CDK2
		PIM1
		DPP4
		CLK1
		MMP3
		BHMT
		DCPS
		F11
		MMP12
		ISG20
		RAB9A
	1,7-Dihydroxy-3,9-dimethoxypterocarpene	PTGS2
		RXRA
		HSP90AB1
		PRSS1
		AR
		PTPN7
		DNMT1
		BCL2A1
		PTPN22
		DUSP3
		NR2E3
		PLA2G1B
		GSK3B
		PGR
		CYP2C9
		ACHE
		PTPN1
		NR3C1
		PIM1
		ESR1
		CYP3A4
		CRHR1
		PTGER1
		CNR1
		ABCB1
		CYP1A2
		RAC1
		TUBB2B
		ALOX5
		MCL1
		IMPDH2
		RELA
		CYP19A1
		IGF1R
		PIK3CG
		ESR2
		MET
		MAPKAPK2
		MAOB
		PTGDR
		MAOA
		TYK2
		PTGS1
		KDR
		MIF
		PPO2
		ALOX15
		AHR
		PDE4B
		HTR6
		ABCG2
		HSD17B1
		BCL2
		TUBA1A
		IKBKB
		PDE4D
		CA4
		MAPK14
		CA6
		ALPL
		TLR9
		HSD17B3
		CTNNA1
		NQO2
		CA2
		AKR1B1
		HADH
		GSR
		CDK2
		CHEK1
		HSD11B1
		DHODH
		OAT
		GSTZ1
		AKR1C3
		DTYMK
		HSP90AA1
		PRKACA
		BACE1
		DCK
		NR1I2
		FGFR1
		PCK1
		PLA2G10
		SHMT1
		PNMT
		SHBG
		CCL5
		AMY2A
		PGF
		CCNA2
		TK1
		GPI
		BHMT
		ELANE
		SULT1E1
		GART
		CASP3
	Quercetin	SOAT2
		SOAT1
		MTTP
		CYP19A1
		AKR1C1
		KIAA1310
		CA12
		CA1
		CA2
		CYP1A1
		CYP2E1
		PRKCB
		CA3
		PRKCA
		PRKACA
		CA4
		CA6
		CA5A
		CA7
		SYK
		SQLE
		CA9
		SLC22A6
		SLC22A11
		CA14
		CA5B
		IGHG1
		ESRRB
		TTR
		CYP1A2
		TOP2A
		ESRRA
		AKT1
		PTK2B
		NCOA2
		NCOA1
		GPER
		COMT
		CDK6
		EIF3F
		SLC16A7
		NR1I2
		STK17B
		SLCO2B1
		ALB
		ESR1
		SHBG
		ATP5B
		HSP90AA1
		ABCB1
		HCK
		CYP2C8
		PIM1
		NQO2
		CBR1
		CEBPB
		UBA1
		JAK1
		ATP5A1
		ABCC1
		AHR
		ATP5C1
		PIK3CG
		SLC16A1
		HSPA2
		ACTB
		CSNK2B
		CSNK2A1
		SF3B3
		CYP1B1
		UGT3A1
		HIBCH
		ESR2
		ABCC2
		ABCG2
		RUVBL2
		PTGS1
		AR
[truncated: 3,392 more rows]
