# Supplementary material for: Exploring the Possible Mechanism and Drug Targets of Huang-Qi-Gui-Zhi-Wu-Wu Decoction for the Treatment of Chemotherapy-Induced Peripheral Neuropathy on Network Pharmacology
Source: Evid Based Complement Alternat Med. 2020 Nov 22;2020:2363262. doi: 10.1155/2020/2363262 (PMC7704154; doi:10.1155/2020/2363262)
Supplement: Supplementary Materials — Supplementary 1. Table S1: compounds identified in the HQGZWWD formula. Supplementary 2. Table S2: effective compounds identified in the HQGZWWD formula. Supplementary 3. Table S3: targets of the HQGZWWD formula. Supplementary 4. Table S4: targets of CIPN. [file 2363262.f1.zip › 2363262.f1/Supplementary Materials S4.txt]

Targets of CIPN
CYP2C8
GSTM1
GSTM3
AGXT
RFX2
BCR
AIPL1
TAC1
FOXC1
ITGA1
ACYP2
DLEU7
BTG4
CAMK2N1
FARS2
GSK3B
BDNF
ERCC2
XRCC1
CCNH
GPX7
ABCC4
TUBB2A
EPHA4
ABCB1
CEP72
ABCA1
ICAM1
SERPINB2
SLC12A6
GSTT1
CYP3A4
CYP3A5
ITGB3
RRM1
SOX10
OPRM1
CYP1B1
SLCO1B1
LIMK2
SCN10A
FANCD2
CRBN
CYP17A1
ASTN2
PXDC1
IYD
FGD4
FZD3
CTLA4
CTSS
GJE1
DYNC1I1
TCF4
CDH13
TENM3
DCC
THBS4
SCN9A
TRPA1
TRPM8
NDRG1
ABCC1
ABCC6
POGZ
PSMB1
IL17RD
EDN1
MED20
BTRC
F2
IL10RA
NFATC4
EPHA6
EPHA8
VAC14
PKNOX1
EPHA5
XKR4
SCN4A
ERCC1
GSTP1
RHOBTB2
CPT1C
SOX8
ALOX12
IGF1R
SOD2
MYO5A
MBL2
PPARD
ERCC4
ERCC3
AURKA
MKI67
DPYD
ABCG2
BCL2
GJB1
NTRK1
IL6
HSPB1
AIFM1
TNF
IFNG
CSF3
EPO
TP53
IL10
TYMP
FAS
TGFB1
IL2
APOE
CD40LG
YARS1
CXCR4
TYR
HLADRB1
DES
IL1B
CASP3
MTHFR
TLR4
ALB
HTR3A
IL2RA
IL4
STAT3
CSF2
VEGFA
ARHGEF10
PRX
GOPC
GTF2H1
ACYP1
CDK7
ROBO2
CAMK2N2
IL4R
GSTM2
MNAT1
CXCL8
TAC4
XPA
CSF3R
GTF2H3
AAR2
MVP
ERCC5
TYRP1
FASLG
TNFRSF1B
